# Supplementary material for: Ethical considerations in global surgery: a scoping review
Source: PubMed Central journal article supplement — BMJ Glob Health. 2020 Apr 21;5(4):e002319. doi: 10.1136/bmjgh-2020-002319 (PMC7204923; doi:10.1136/bmjgh-2020-002319), 2020-04-21
Supplement: bmjgh-2020-002319supp001.pdf [file bmjgh-2020-002319supp001.pdf]

**Supplementary Material 1: Example of search strategy developed for use in Embase and modified according to database queried.**

1. Exp ethics/
2. Ethic\*.mp.
3. Exp morality/
4. Moral\*.mp.
5. Exp social responsibility
6. Medical ethic\*.mp.
7. 1 or 1 or 3 or 4 or 5 or 6
8. Exp surgery/
9. Surger\*.mp.
10. Exp surgeon/
11. Surgeon\*.mp.
12. Surgical\*.mp.
13. Operati\*.mp.
14. 8 or 9 or 10 or 11 or 12 or 13
15. 7 and 14
16. Exp developing country/
17. Exp global health/
18. Global health.mp.
19. Exp international cooperation/
20. Lmic\*.mp.
21. Developing countr\*.mp.
22. Global surg\*.mp.
23. (low and middle income countr\*).mp.
24. 16 or 17 or 18 or 19 or 20 or 21 or 22 or 23
25. 15 and 24
